# Supplementary material
Source: publisher site journal article supplement (http://www.degruyter.com/publication/journal_key/CCLM/downloadAsset/CCLM_Instructions%20on%20Ethical%20and%20Legal%20Declarations.pdf)
Supplement: Supplementary file 1 [file CCLM_Instructions%20on%20Ethical%20and%20Legal%20Declarations.pdf]

# INSTRUCTIONS

## ETHICAL AND LEGAL DECLARATIONS

The author and ethical statements in their default format are a **requirement for submission** to De Gruyter Journals. Statements are to be customised as described below and submitted alongside with manuscripts. **All authors** are requested to include information regarding sources of funding for their research, author contributions and financial or non-financial interests.

**For all studies that involved humans and/or animals** authors additionally have to include study-specific approval by the appropriate ethics committee as well as informed consent if the research involved human participants. The decision as to whether the latter information must be included depends not only on the journal in question, but also on the scope of the submission. Therefore, the responsibility remains with the authors to include the relevant disclosures and declarations.

### RESEARCH FUNDING

This section should describe sources of funding that have supported the work. Authors should state how the research described in their article was funded, including grant numbers if applicable. Whenever funding has been obtained the following statement should be included: *The funding organization(s) played no role in the study design; in the collection, analysis, and interpretation of data; in the writing of the report; or in the decision to submit the report for publication.*

**MANDATORY**

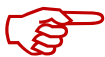

The template default statement applies for the case that no funding has been involved, with no further customization needed.

### AUTHOR CONTRIBUTIONS

De Gruyter recommends that authors adhere to the guidelines for authorship that are applicable in their specific research field. The following guidelines give orientation for the definition of authorship, contributorship and group authorship <sup>1,2</sup>:

1. Substantial contributions to the conception or design of the work; or the acquisition, analysis, or interpretation of data for the work; AND
2. Drafting the work or revising it critically for important intellectual content; AND
3. Final approval of the version to be published; AND
4. Agreement to be accountable for all aspects of the work in ensuring that questions related to the accuracy or integrity of any part of the work are appropriately investigated and resolved.

Each author listed must meet all 4 criteria of authorship. All remaining contributors should be listed in the Acknowledgments. Exceptions may be made at the discretion of the editor.

1. ICMJE, Defining the Role of Authors and Contributors, 2018, <http://www.icmje.org/recommendations/browse/roles-and-responsibilities/defining-the-role-of-authors-and-contributors.html>

2. Transparency in authors' contributions and responsibilities to promote integrity in scientific publication, McNutt at all, PNAS February 27, 2018 <https://doi.org/10.1073/pnas.1715374115>

**MANDATORY**

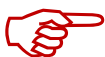

The template default statement represents the minimum declaration needed for submission. Individual contributions may be included if desired or requested by the individual journal.

### COMPETING INTERESTS

To ensure fair and objective decision-making, authors must declare any relationships that pose an actual or potential conflict of interest (financial, personal or professional), in connection with evaluated manuscripts.

When submitting their manuscript, all authors must read and complete the [Author Form for Disclosure of Potential Conflicts of Interest](#) (the form is based on the ICMJE Disclosure Form that can be found [here](#)).

**MANDATORY**

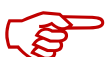

The template default statement applies for cases where no competing interests exist. Include any additional information regarding the work under consideration for publication as stated within the Disclosure Form.

## ETHICAL APPROVAL

→ **Please note: If the research conducted does not relate to either human or animal use, the statements do not apply and can be removed!**

### Authorization for the use of human subjects

Manuscripts containing information related to human use should clearly state that the research has complied with all relevant national regulations and institutional policies and has been approved by the authors' institutional review board or equivalent committee. Copies of the guidelines and policy statements must be available for review by the Managing Editor if necessary. The editors reserve the right to seek additional information or guidance from reviewers on any cases in which concerns arise. All investigation conducted with human subjects must have followed the tenets of the [Helsinki Declaration](#). Additionally, authors must identify the committee or review board approving the experiments, and provide a statement indicating approval of the research.

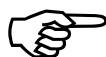

The template default statement applies in cases where the local Institutional Review Board deemed the study exempt from review. **In all other cases**, the following statement has to be included alongside with the respective board/committee number:

**The research related to human use has complied with all the relevant national regulations, institutional policies, and in accordance with the tenets of the Helsinki Declaration, and has been approved by the authors' Institutional Review Board or equivalent committee. (Name, approval number).**

### Authorization for the use of experimental animals

Manuscripts containing information related to animal use should clearly state that the research has complied with all relevant national regulations and institutional policies and has been approved by the authors' institutional review board or equivalent committee. Copies of the guidelines and policy statements must be available for review by the Managing Editor if necessary. The editors reserve the right to seek additional information or guidance from reviewers on any cases in which concerns arise. The research using animal subjects should be conducted according to the [Principles of Laboratory Animal Care and similar documents](#). For manuscripts reporting experiments on live vertebrates or higher invertebrates, authors must identify the committee approving the experiments, and must confirm that all experiments were performed in accordance with relevant regulations.

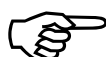

The template default statement applies in cases where the local Institutional Review Board deemed the study exempt from review. **In all other cases**, the following statement has to be included alongside with the respective board/committee number:

**The research related to animals' use has complied with all the relevant national regulations and institutional policies for the care and use of animals. (Name, approval number).**

## INFORMED CONSENT

→ **Please note: If the research conducted does not relate to human use and/or not infringe any personal rights, this statement does not apply and can be removed!**

The protection of privacy is a legal right that must not be breached without individual informed consent. In cases where the identification of personal information is necessary for scientific reasons, authors should obtain full documentation of informed consent, including written permission from the patient prior to inclusion in the study.

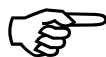

The template default statement applies in cases where informed consent was obtained from all individuals included in the study. For all trials that involve children, De Gruyter assumes that informed consent was obtained from the parents or legal guardians.
